# Supplementary material for: Diurnal Pine Bark Structure Dynamics Affect Properties Relevant to Firebrand Generation
Source: Preprints.org preprint supplement (doi:10.20944/preprints202009.0533.v1), 2020-09-23
Supplement: Supplementary file 1 [file supplementary]

**Supplementary Figure 1.** Temperature (°C) and relative humidity (%) data by a weather station at Tall Timbers for the duration of the experiment. Samples and observations were taken daily for three days at 0800, 1100, and 1400 on May 15-17, 2019. Sample periods are designated by the hours listed. In the two weeks leading up to the experiment (April 1, 2019 – April 14, 2019), mean temperatures were °23 C, RH ranged from 35-100% in diurnal cycles similar to Figure S1 and precipitation was 0.0 cm. Climate data was collected from a weather station on-site.

**Supplementary Figure 2.** Temperature (°C) and relative humidity (%) data by a weather station at Tall Timbers for the duration of the experiment. Samples and observations were taken hourly from 1100 to 1700 on August 9, 2018. Sample periods are designated by the hours listed. In the two weeks leading up to the experiment (July 26, 2018 – August 8, 2018), mean temperatures were °26 C, RH ranged from 45-96% in diurnal cycles similar to Figure S1 and precipitation was 0.0 cm. Climate data was collected from a weather station on-site.
